# Supplementary material
Source: publisher site journal article supplement (https://www.dovepress.com/article/485915)
Supplement: Supplementary file 1 [file get_supplementary_file.php]

**Figure S1** The ROC curve of APACHE II score, SOFA score, number of organ failures and length of hospital stay predicting CRE colonization
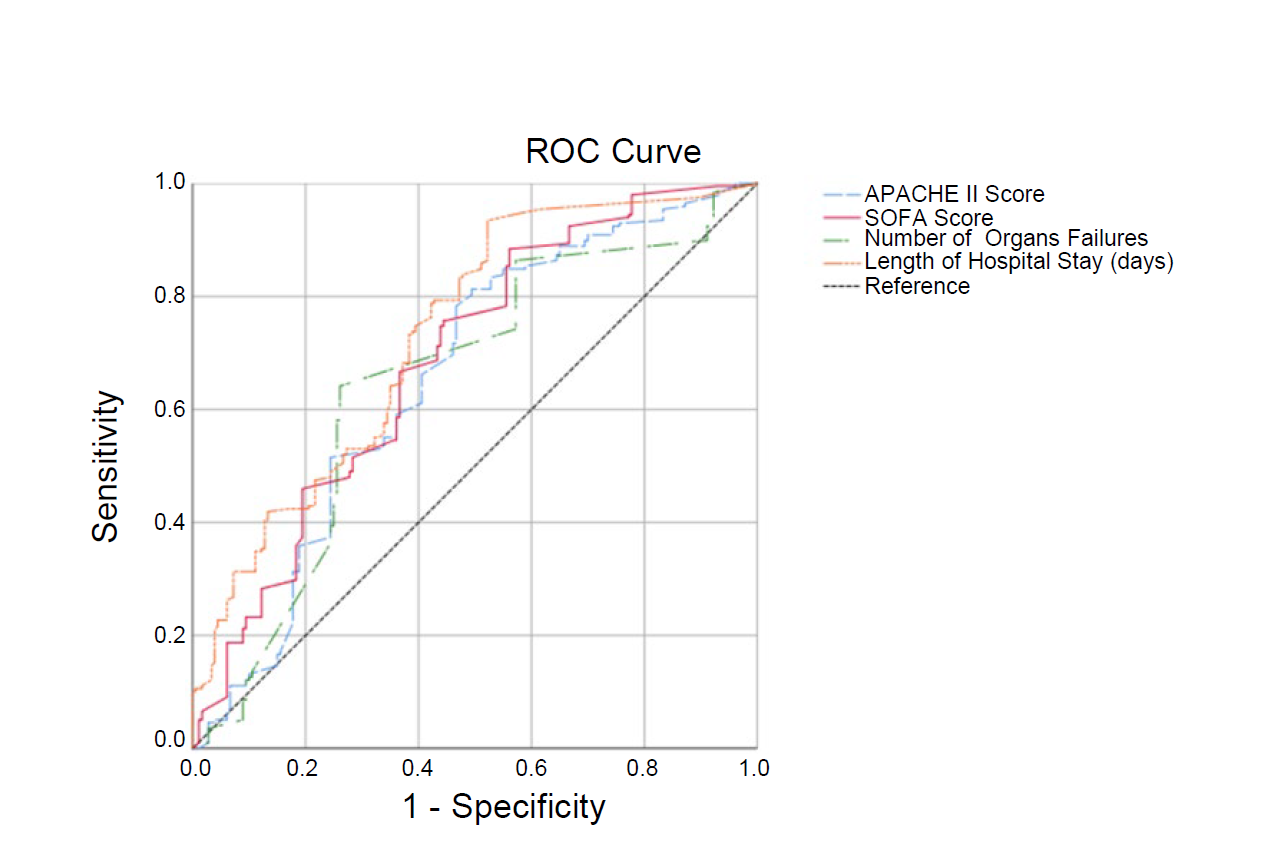


**Table S1** Distribution of the CRE-colonized group’s swabs

| CRE | All sites, n (%) | Throat, n (%) | Rectum, n (%) |
| --- | --- | --- | --- |
| *Escherichia coli* | 14(58.3%) | 1(4.2%) | 14(58.3%) |
| *Klebsiella pneumoniae* | 4(16.7%) | 2(8.3%) | 3(12.5%) |
| *Acinetobacter baumannii* | 2(8.3%) | 1(4.2%) | 2(8.3%) |
| *Enterobacter cloacae* | 1(4.2%) | 0(0.0%) | 1(4.2%) |
| *Citrobacter freundii* | 1(4.2%) | 0(0.0%) | 1(4.2%) |
| *Klebsiella aerogenes* | 1(4.2%) | 0(0.0%) | 1(4.2%) |
| *Klebsiella oxytoca* | 1(4.2%) | 0(0.0%) | 1(4.2%) |
| Total | 24(100.0%) | 4(16.7%) | 23(95.8%) |

**Abbreviations:** CRE: Carbapenem-Resistant Enterobacteriaceae.

**Table S2** Distribution of CRE resistance to antibiotics

| CRE | IPM | MEM | CTX | FEP | ATM |
| --- | --- | --- | --- | --- | --- |
| *Escherichia coli* | 14(100.0%) | 14(100.0%) | 13(92.9%) | 13(92.9%) | 5(35.7%) |
| *Klebsiella pneumoniae* | 4(100.0%) | 4(100.0%) | 3(75.0%) | 3(75.0%) | 2(50.0%) |
| *Acinetobacter baumannii* | 2(100.0%) | 2(100.0%) | 2(100.0%) | 2(100.0%) | 1(50.0%) |
| *Enterobacter cloacae* | 1(100.0%) | 1(100.0%) | 1(100.0%) | 1(100.0%) | 0(0.0%) |
| *Citrobacter freundii* | 1(100.0%) | 1(100.0%) | 1(100.0%) | 1(100.0%) | 0(0.0%) |
| *Klebsiella aerogenes* | 1(100.0%) | 1(100.0%) | 1(100.0%) | 1(100.0%) | 1(100.0%) |
| *Klebsiella oxytoca* | 1(100.0%) | 1(100.0%) | 1(100.0%) | 1(100.0%) | 0(0.0%) |
| Total | 24(100.0%) | 24(100.0%) | 22(91.7%) | 22(91.7%) | 9(37.5%) |

**Abbreviations:** CRE: Carbapenem-Resistant Enterobacteriaceae; IPM: Imipenem; MEM: Meropenem; CTX: Ceftazidime; FEP: Cefepime; ATM: Aztreonam.

**Table S3** Influencing factors predict the area under ROC curve of CRE colonization

|  | Cut-Off Value | Sensitivity | Specificity | AUC |
| --- | --- | --- | --- | --- |
| APACHE II Score | 16 | 0.80 | 0.51 | 0.656 |
| SOFA Score | 6 | 0.88 | 0.56 | 0.686 |
| Number of Organ Failures | 2 | 0.65 | 0.62 | 0.649 |
| Length of Hospital Stay (days) | 31 | 0.50 | 0.83 | 0.732 |

**Abbreviations:** CRE: Carbapenem-Resistant Enterobacteriaceae; ROC: Receiver Operator Characteristic; APACHE II: Acute Physiology and Chronic Health Evaluation; SOFA: Sequential Organ Failure Assessment.
